# Supplementary material for: In Vitro Reconstitution of Yeast Translation System Capable of Synthesizing Long Polypeptide and Recapitulating Programmed Ribosome Stalling
Source: MDPI journal article supplement (doi:10.3390/mps4030045), 2021-07-04
Supplement: s1 [file s1]

**Table S1.** Summary of the experimentally estimated absorption coefficients of the purified factors. After the absorption spectrum of the factor was measured using a spectrometer and the protein concentration of the factor was determined by the Bradford Assay, the absorption coefficient of the factor at 280 nm at 1 mg/mL was estimated.

| <b>Component</b> | <b>A<sub>280</sub><br/>(A<sub>280-320</sub>)</b> | <b>Dilution for<br/>spectrum<br/>analysis</b> | <b>A<sub>280</sub> of<br/>undiluted<br/>protein</b> | <b>Protein<br/>concentration<br/>(mg/mL)</b> | <b>Absorption<br/>coefficient (@<br/>1mg/mL)</b> |
|------------------|--------------------------------------------------|-----------------------------------------------|-----------------------------------------------------|----------------------------------------------|--------------------------------------------------|
| <b>eEF1A</b>     | 0.805                                            | 4                                             | 3.2                                                 | 4.67                                         | 0.69                                             |
| <b>eEF2</b>      | 0.554                                            | 4                                             | 2.2                                                 | 2.50                                         | 0.89                                             |
| <b>eEF3</b>      | 1.092                                            | 20                                            | 22                                                  | 28.3                                         | 0.77                                             |
| <b>eRF1</b>      | 0.791                                            | 5                                             | 4.0                                                 | 6.65                                         | 0.59                                             |
| <b>eRF3Δ165</b>  | 1.052                                            | 10                                            | 11                                                  | 14.4                                         | 0.73                                             |
| <b>Dom34</b>     | 0.410                                            | 4                                             | 1.6                                                 | 2.16                                         | 0.76                                             |
| <b>Hbs1</b>      | 1.089                                            | 4                                             | 4.4                                                 | 4.14                                         | 1.1                                              |
| <b>Rli1</b>      | 0.279                                            | 2                                             | 0.56                                                | 1.47                                         | 0.38                                             |

**Table S2.** Summary of the expression and purification of the components for the reconstituted translation system.

| Component           | Gene  | MW (kDa) | Tag (N- or C-terminal) | Strain                                                                                   | Vector                                                            | Yield (from 1 L culture)   |
|---------------------|-------|----------|------------------------|------------------------------------------------------------------------------------------|-------------------------------------------------------------------|----------------------------|
| <b>eEF1A</b>        | TEF1  | 50       | None                   | Yeast YPH499                                                                             |                                                                   | 1 mg                       |
| <b>eEF2</b>         | EFT2  | 93       | His-tag (C)            | Yeast TKY675                                                                             |                                                                   | 40 mg                      |
| <b>eEF3</b>         | YEF3  | 116      | His-tag (C)            | <i>E. coli</i> JM109(DE3)<br>pRARE<br>(Promega)<br>Rosetta(DE3)pLysS can be substituted. | pET29b-eEF3<br>(Hayashi, H., 2018, <i>J. Biochem.</i> )           | 700 mg                     |
| <b>eRF1</b>         | SUP45 | 49       | His-tag (C)            | <i>E. coli</i> Rosetta(DE3)pLysS<br>(Sigma-Aldrich)                                      | pET21a-eRF1<br>(Kurata, S., 2013, <i>Nucleic Acids Res.</i> )     | 8.5 mg                     |
| <b>eRF3 165</b>     | SUP35 | 58       | His-tag (C)            | <i>E. coli</i> BL21(DE3)<br>(Sigma-Aldrich)                                              | pET21a-eRF3 165<br>(Kurata, S., 2013, <i>Nucleic Acids Res.</i> ) | 24 mg                      |
| <b>Dom34</b>        | DOM34 | 44       | His-tag (C)            | <i>E. coli</i> Rosetta(DE3)pLysS<br>(Sigma-Aldrich)                                      | pET29b-Dom34<br>(Abe, T., 2020, <i>J. Biochem.</i> )              | 2.2 mg                     |
| <b>Hbs1</b>         | HBS1  | 68       | His-tag (C)            | <i>E. coli</i> BL21(DE3)<br>(Sigma-Aldrich)                                              | pETDuet-1-Hbs1<br>(Abe, T., 2020, <i>J. Biochem.</i> )            | 1.6 mg                     |
| <b>Rli1</b>         | RLI1  | 68       | His-tag (C)            | Yeast INVSc1                                                                             | pYES2-Rli1<br>(Abe, T., 2020, <i>J. Biochem.</i> )                | 35 mg                      |
| <b>80S ribosome</b> |       |          | -                      | Yeast W303                                                                               |                                                                   | 110 pmol                   |
| <b>tRNA mixture</b> |       |          | -                      | Yeast YPH499                                                                             |                                                                   | 120 A <sub>260</sub> units |

**Table S3.** Yeast strains used for the purification of the components for the reconstituted translation system.

| <b>Name</b>   | <b>Genotype</b>                                                                                | <b>Source</b>                          |
|---------------|------------------------------------------------------------------------------------------------|----------------------------------------|
| <b>YPH499</b> | MATa <i>ura3-52 lys2-801_amber ade2-101_ochre trp1-Δ63 his3-Δ200 leu2-Δ1</i>                   | Lab stock                              |
| <b>TKY675</b> | MATa <i>ade2 leu2 ura3 his 3 leu2 trp1 eft1::HIS3 ef2::TRP1 pEFT2-His<sub>6</sub> LEU2 CEN</i> | Ortiz, P., 2006, <i>J. Biol. Chem.</i> |
| <b>INVSc1</b> | MATa <i>his3Δ1 leu2 trp1-289 ura3-52/MATα his3Δ1 leu2 trp1-289 ura3-52</i>                     | Thermofisher Scientific                |
| <b>W303</b>   | MATa/MATα <i>{leu2-3,112 trp1-1 can1-100 ura3-1 ade2-1 his3-11,15} [phi+]</i>                  | Lab stock                              |

**Table S4.** Translation reaction condition for checking the activity of the components in the reconstituted translation system.

| <b>Component</b>                  | <b>[Mg<sup>2+</sup>/Spd/Sp]</b>        | <b>mRNA</b>        | <b>Note</b>                                                                             |
|-----------------------------------|----------------------------------------|--------------------|-----------------------------------------------------------------------------------------|
| <b>eEF1A</b>                      | [5/0.25/0]                             | no motif           | eEF3 dependency should be checked.                                                      |
| <b>eEF2</b>                       | [5/0.25/0]                             | no motif           |                                                                                         |
| <b>eEF3</b>                       | [5/0.25/0]                             | no motif           |                                                                                         |
| <b>eRF1</b>                       | [5/0.25/0]                             | no motif           |                                                                                         |
| <b>eRF3<math>\Delta</math>165</b> | [5/0.25/0]                             | no motif           |                                                                                         |
| <b>Dom34</b>                      | [5/0.25/0]                             | no motif           |                                                                                         |
| <b>Hbs1</b>                       | [5/0.25/0]                             | no motif           |                                                                                         |
| <b>Rli1</b>                       | [5/0.25/0]                             | no motif           |                                                                                         |
| <b>80S ribosome</b>               | [5/0.25/0]<br>[6/0.25/0]<br>[7/0.25/0] | no motif<br>Pro x4 | Polyproline-mediated ribosomal stalling and its alleviation by eIF5A should be checked. |
| <b>Aminoacyl-tRNAs</b>            | [5/0.25/0]                             | no motif           |                                                                                         |

**Table S5.** Components in the reconstituted translation system dissolved in buffer that contained Mg<sup>2+</sup>.

| <b>Component</b>                     | <b>Mg<sup>2+</sup> in the stock buffer [mM]</b> | <b>reference</b> |
|--------------------------------------|-------------------------------------------------|------------------|
| <b>Creatine kinase</b>               | 10                                              | [1]              |
| <b>Myokinase</b>                     | 10                                              | [1]              |
| <b>Nucleoside-diphosphate kinase</b> | 10                                              | [1]              |
| <b>Pyrophosphatase</b>               | 10                                              | [1]              |
| <b>eEF1A</b>                         | 5                                               | [18]             |
| <b>eEF2</b>                          | 0                                               | [18]             |
| <b>eEF3</b>                          | 0                                               | [18]             |
| <b>eRF1</b>                          | 0                                               | [18]             |
| <b>eRF3Δ165</b>                      | 1                                               | [18]             |
| <b>Dom34</b>                         | 0                                               | [18]             |
| <b>Hbs1</b>                          | 1                                               | [18]             |
| <b>Rli1</b>                          | 0                                               | [18]             |
| <b>80S ribosome</b>                  | 5                                               | [18]             |

**Table S6.** Sequence of template DNA. The template DNA sequences for the model mRNAs encoding nanoluciferase used in Figure 2 are shown. Translation is initiated from the first codon GCT(Ala) just downstream of the CrPV IRES sequence, which is derived from the native CrPV IRES genome sequence. We note that mutations of the GCT(Ala) codon in these model mRNAs do not affect the translation of nanoluciferase, consistent with the previous study [20]. We also note that the model mRNA constructs lack a 3' untranslated region (3' UTR), and the addition of the poly(A)<sub>36</sub> sequence does not show an obvious effect, at least in terms of the translation of nanoLuciferase under our conditions (unpublished results).

|                                                                                                                                                                                                                                                                                                                                                                                                                                                                                                                                                                                                                                                                                                                                                                                                                                                                                                                                                                                                                                                                                                                                                                                                                                                                                                                                                                                                                                                                                                                                                                                 |
|---------------------------------------------------------------------------------------------------------------------------------------------------------------------------------------------------------------------------------------------------------------------------------------------------------------------------------------------------------------------------------------------------------------------------------------------------------------------------------------------------------------------------------------------------------------------------------------------------------------------------------------------------------------------------------------------------------------------------------------------------------------------------------------------------------------------------------------------------------------------------------------------------------------------------------------------------------------------------------------------------------------------------------------------------------------------------------------------------------------------------------------------------------------------------------------------------------------------------------------------------------------------------------------------------------------------------------------------------------------------------------------------------------------------------------------------------------------------------------------------------------------------------------------------------------------------------------|
| <b>FLAG-Pgk-nLuc-HA_ [-] (for no no motif mRNA)</b>                                                                                                                                                                                                                                                                                                                                                                                                                                                                                                                                                                                                                                                                                                                                                                                                                                                                                                                                                                                                                                                                                                                                                                                                                                                                                                                                                                                                                                                                                                                             |
| <p>5'-GGGCCTAATACGACTCACTATA<b>G</b>GGAGACCGGAATTC<b>AAAGCAAAAATGTGATCT</b><br/> <b>TGCTTGTAATAACAATTTGAGAGGTTAATAAATTACAAGTAGTGCTATTTTGTATTT</b><br/> <b>AGGTTAGCTATTTAGCTTTACGTTCCAGGATGCCTAGTGGCAGCCCCACAATATCCAG</b><br/> <b>GAAGCCCTCTCTGCGGTTTTTCAGATTAGGTAGTCGAAAAACCTAAGAAATTTACCT</b><br/> gctatggattacaaggacgacgacgacaagGAATTATCTTCAAAGTTGTCTGTCCAAGATTTGGACT<br/> <b>TGAAGGACAAGCGTGTCTTCATCAGAGTTGACTTCAACGTCCCATTTGGACGGTAAG</b><br/> <b>AAGATCACTTCTACGGTTTTTCACCTTGGAAGATTTTCGTTGGTGATTGGAGACAAA</b><br/> <b>CTGCTGGTTACAATTTGGATCAAGTCTTGGAACAAGGTGGTGTCTCTTCTTTGTT</b><br/> <b>TCAAACTTGGGTGTTTCCGTTACCCCAATCCAAAGAATAGTTTTGTCTGGTGAA</b><br/> <b>AACGGTTTGAAGATCGATATCCATGTTATCATCCATACGAAGGTTTGTGAGGTG</b><br/> <b>ATCAAATGGGTCAAATCGAAAAGATCTTCAAGGTTGTTTACCCAGTTGATGATC</b><br/> <b>ACCACTTTAAGGTTATCTTGCACTACGGTACTTTGGTCATTGATGGTGTTACTCC</b><br/> <b>AAACATGATCGATTACTTTGGTAGACCTTACGAAGGTATTGCTGTTTTTCGATGGT</b><br/> <b>AAGAAGATTACTGTCACTGGTACTTTGTGGAACGGTAACAAAATTATCGACGAA</b><br/> <b>AGATTGATCAACCCAGACGGTTCTTTGTTGTTTCAGAGTTACTATTAACGGTGTTA</b><br/> <b>CCGGTTGGAGATTGTGCGAAAGAATTTTGGCT</b>taccatacgacgtcccagactacgcgTAA-3'</p> <p>(Boxed G, T7 start; single underline, CrPV IRES; small letters, FLAG- or HA-tag; double underline, pgk; bold, nLuc)</p> <p>Translation of ORF:<br/> AMDYKDDDDKELSSKLSVQDLDLKDKRVFIRVDFNVPLDGKKITSTVFTLEDFVGDWRQ<br/> TAGYNLDQVLEQGGVSSLFQNLGVSVTPIQRIVLSGENGLKIDIHVIIPYEGLSGDQMGQI<br/> EKIFKVVPVDDHHFKVILHYGTLVIDGVTPNMIDYFGRPYEGIAVFDGKKITVTGTLWN<br/> GNKIIDERLINPDGSLFRVTINGVTGWRLCERILAYPYDVDPYA</p> |
| <b>FLAG-Pgk-nLuc-HA_ P[Pro x4] (for Pro x4 mRNA)</b>                                                                                                                                                                                                                                                                                                                                                                                                                                                                                                                                                                                                                                                                                                                                                                                                                                                                                                                                                                                                                                                                                                                                                                                                                                                                                                                                                                                                                                                                                                                            |

5'-GGGCCTAATACGACTCACTATAGGGGAGACCGGAATTCAAAGCAAAAATGTGATCT  
TGCTTGTAAATACAATTTTGAGAGGTTAATAAATTACAAGTAGTGCTATTTTTGTATT  
AGGTTAGCTATTTAGCTTTACGTTCCAGGATGCCTAGTGGCAGCCCCACAATATCCAG  
GAAGCCCTCTCTGCGGTTTTTCAGATTAGGTAGTCGAAAAACCTAAGAAATTTACCT  
gctatggattacaaggacgacgacgacaagGAATTATCTTCAAAGTTGTCTGTCCAAGATTGGACT  
TGAAGGACAAGCGTGTCTTCATCAGAGTTGACTTCAACGTCCCATTGGACGGTAAG  
AAGATCACTTCTCCTCCCCCACCGACGGTTTTCACCTTGGAAGATTTTCGTTGGTG  
ATTGGAGACAAACTGCTGGTTACAATTTGGATCAAGTCTTGGAACAAGGTGGTG  
TCTCTTCTTTGTTTCAAACTTGGGTGTTTCCGTTACCCAATCCAAAGAATAGTT  
TTGTCTGGTGAAAACGGTTTGAAGATCGATATCCATGTTATCATCCCATACGAAG  
GTTTGTCAAGTGATCAAATGGGTCAAATCGAAAAGATCTTCAAGGTTGTTTACC  
CAGTTGATGATCACCACCTTAAGGTTATCTTGCCTACGGTACTTTGGTCATTGA  
TGGTGTTACTCCAAACATGATCGATTACTTTGGTAGACCTTACGAAGGTATTGCT  
GTTTTCGATGGTAAGAAGATTACTGTCCTGGTACTTTGTGGAACGGTAACAAA  
ATTATCGACGAAAGATTGATCAACCCAGACGGTTCTTTGTTGTTTCAGAGTTACTA  
TTAACGGTGTTACCGGTTGGAGATTGTGCGAAAGAATTTTGGCTtaccatacgacgtccc  
agactacgcgTAA-3'

(Boxed G, T7 start; single underline, CrPV IRES; small letters, FLAG- or HA-tag; double underline, pgk; gray-shaded, polyproline motif; bold, nLuc)

Translation of ORF:

AMDYKDDDDKELSSKLSVQDLDLKDKRVFIRVDFNVPLDGKKITSPPPPTVFTLEDFVGD  
WRQTAGYNLDQVLEQGGVSSLFQNLGVSVTPIQRIVLSGENGLKIDIHVIIPYEGLSGDQ  
MGQIEKIFKVVYPVDDHHFKVILHYGTLVIDGVTPNMIDYFGRPYEGIAVFDGKKITVTGT  
LWNGNKIIDERLINPDGSLLFRVTINGVTGWRLCERILAYPYDVPDYA
